# Supplementary material
Source: Springer Nature journal article supplement (https://www.springermedizin.de/resource/supplementary/13006_2013_174_MOESM2_ESM.pdf/9628174)

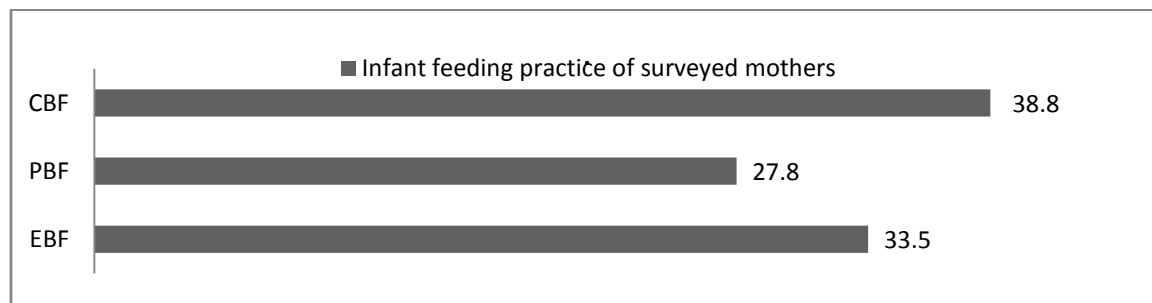

Figure 2- Proportion of mothers and their infant feeding practice

Supplement: MOESM2 [file 9628174]
